# Supplementary material for: Allied health professionals’ perceptions of research in the United Kingdom national health service: a survey of research capacity and culture
Source: Springer Nature journal article supplement (doi:10.1186/s12913-022-08465-6), 2022-08-27
Supplement: MOESM3 [file 23424208]

# AHP Research Survey

Research is everyone's business... isn't it?

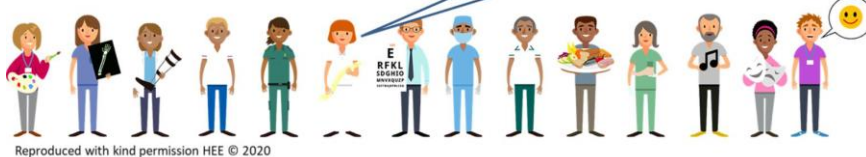

Reproduced with kind permission HEE © 2020

**3145**

AHPs working across the UK in NHS health and social care took part in the survey

## Why this study is important

- AHPs play a key role in meeting escalating healthcare demands
- Research is the single most important way to improve healthcare
- AHP-led research evidence is needed to underpin advancing AHP roles
- Little is known about current AHP research capacity or culture

## RESEARCH CAPACITY AND CULTURE

### Motivators for research engagement

**81%**

developing skills

**62%**

increased job satisfaction

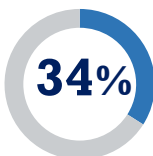

research included in job role

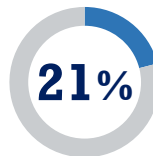

of these have ≥25% time allocated for research

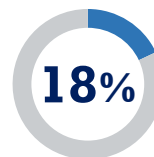

routinely discuss research at appraisal

### Barriers to research engagement

**83%**

prioritisation of other job roles

**81%**

lack of time

## RESEARCH RATINGS

Individual research skills/success

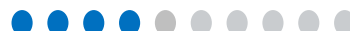

Team research skills/success

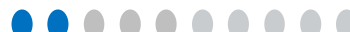

Organisation research skills/success

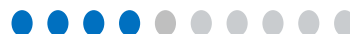

Less than adequate

## RECOMMENDATIONS

### national strategic

improve visibility of research organisations; ensure they are relevant to and provide support targeted at AHP clinical managers; set expectations for a stronger AHP research culture in NHS health and social care teams

### organisation level

include a focus on AHP research posts and career pathways in research strategy; support middle managers in implementing the organization's research strategy

### team level

introduce routine discussions focusing on research engagement during appraisals; capitalise on positive benefits from research (development of skills, job satisfaction) that are likely to impact on staff recruitment and retention

### Individual level

build on individual motivation; consider using a self-appraisal tool to identify research development needs and aspirations
